# Supplementary material for: IL-15 and a Two-Step Maturation Process Improve Bone Marrow-Derived Dendritic Cell Cancer Vaccine
Source: PubMed Central journal article supplement (PMC6356194; doi:10.3390/cancers11010040), 2019-01-04
Supplement: cancers-11-00040-s001.pdf [file cancers-11-00040-s001.pdf]

# IL-15 and a Two-Step Maturation Process Improve Bone Marrow-Derived Dendritic Cell Cancer Vaccine

Ananda Mookerjee, Michele Graciotti and Lana E. Kandalafi

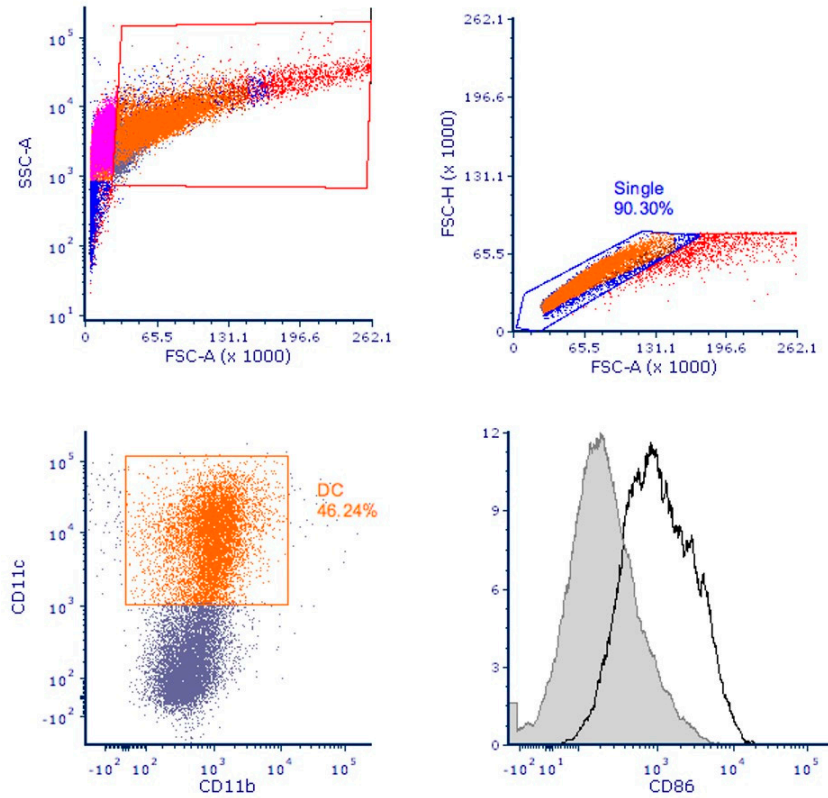

**Figure S1.** Example of the gating strategy for DCs and for the surface marker CD86. Cells were prepared as reported in Figure 2 (GM4-1step DCs) and analyzed by FACS; grey: isotype control staining, black: CD86 antibody staining. (DC: dendritic cells).

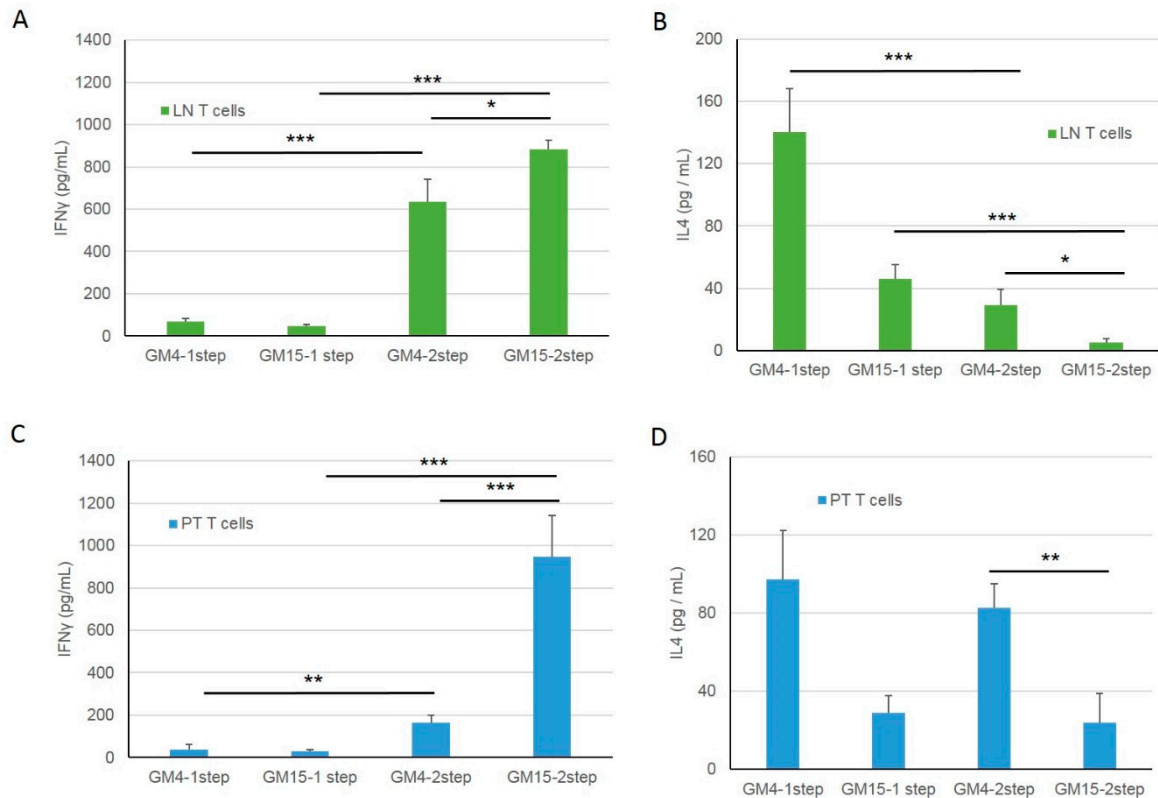

**Figure S2.** DCs matured with a two-step protocol in the presence of anti-CD40 and anti-IL10R antibodies for 24 h, followed by LPS/IFN $\gamma$ /CpG stimulate a more Th1-skewed T cell response compared to canonical LPS/IFN $\gamma$  maturation. (A–D) IFN $\gamma$  and IL-4 production measure by ELISA after 24 h co-culturing of the indicated DC formulations with T-lymphocytes isolated from mesenteric and inguinal draining lymph nodes (LN) or peritoneum (PT) of tumor bearing animals. Data are representative of at least 3 independent experiments. Significant differences were assessed with unpaired Student’s t test and indicated with asterisks: \*  $p < 0.05$ ; \*\*  $p < 0.01$ ; \*\*\*  $p < 0.005$ . (CpG oligonucleotides; DC: dendritic cells; IL-10R: interleukin-10 receptor; IFN- $\gamma$ : interferon- $\gamma$ ; LPS: lipopolysaccharide).

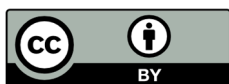

© 2019 by the authors. Licensee MDPI, Basel, Switzerland. This article is an open access article distributed under the terms and conditions of the Creative Commons Attribution (CC BY) license (<http://creativecommons.org/licenses/by/4.0/>).
